# Supplementary material for: Metabolomic signatures of intestinal colonization resistance against Campylobacter jejuni in mice
Source: Frontiers journal article supplement (doi:10.3389/fmicb.2023.1331114), 2023-12-18
Supplement: Data_Sheet_1.PDF [file Data_Sheet_1.PDF]

## Supplementary Material

# Metabolomic Signatures of Intestinal Colonization Resistance against *Campylobacter jejuni* in Mice

Nizar W. Shayya<sup>1</sup>, Rasmus Bandick<sup>1</sup>, Lia Busmann<sup>1</sup>, Soraya Mousavi<sup>1</sup>, Stefan Bereswill<sup>1#</sup> and Markus M. Heimesaat<sup>1#\*</sup>

\* Correspondence: Markus M. Heimesaat: [markus.heimesaat@charite.de](mailto:markus.heimesaat@charite.de)

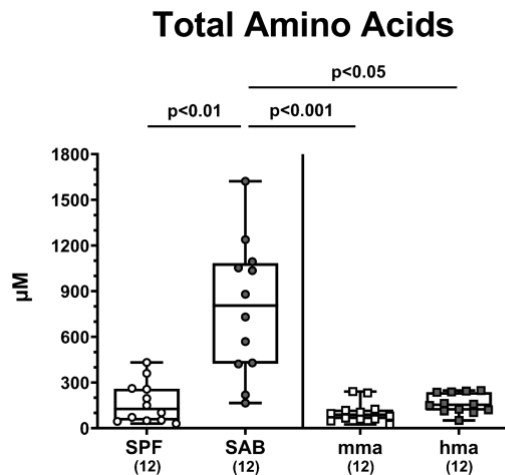

### Supplementary Figure 1. Sum of free amino acids in the feces of mice with and without CR.

Fecal samples from SPF mice (n=12), SAB mice (n=12), mma mice (n=12), and hma mice (n=12) were harvested and amino acids were analyzed by LC-MS/MS, before *C. jejuni* infection. Metabolite concentration was expressed by µM. Box plots indicate the 25<sup>th</sup> and 75<sup>th</sup> percentiles of the median (black bar inside the box), as well as the total range. Significance levels (p values) were determined by the Kruskal-Wallis test with Dunn's post correction. Numbers (in parentheses) indicate the number of mice included.

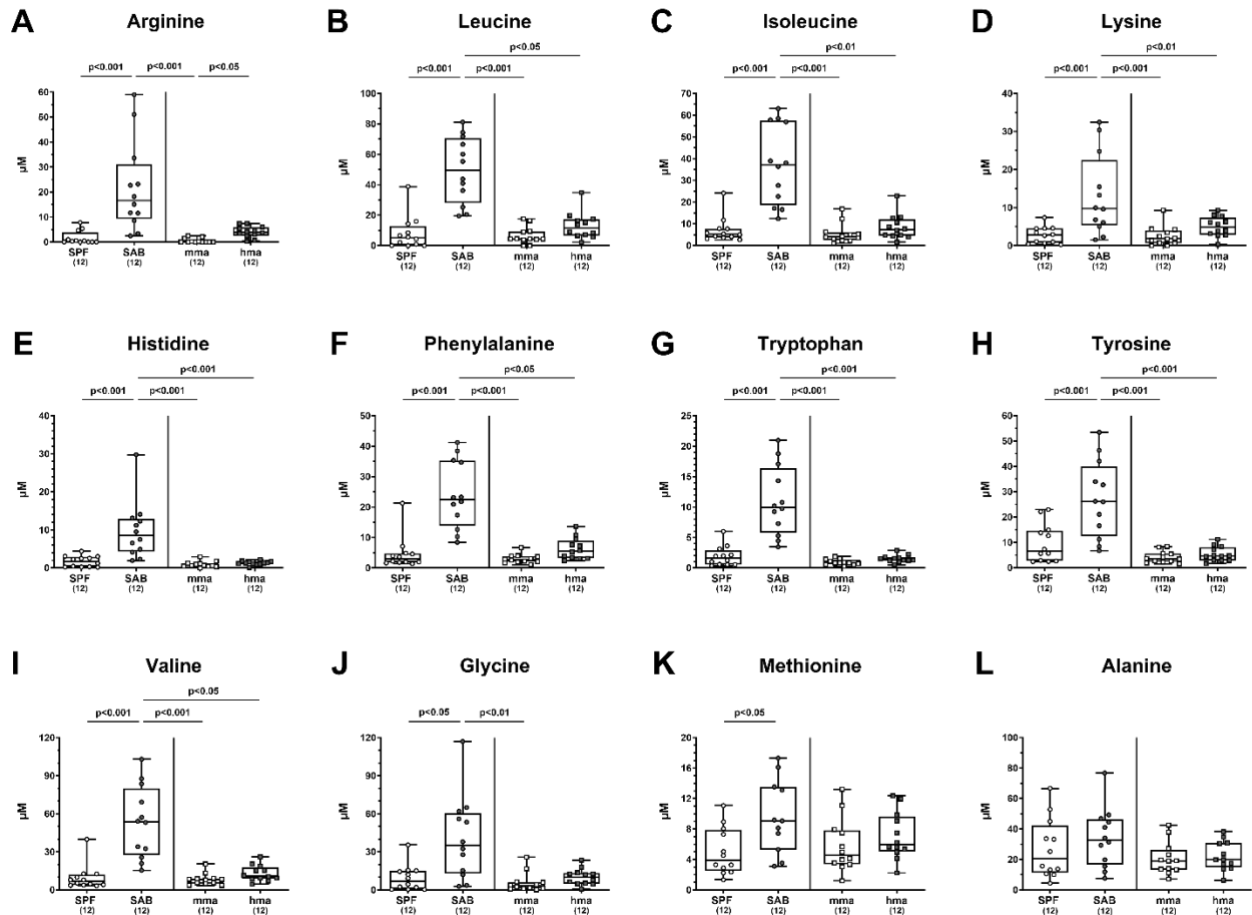

**Supplementary Figure 2. Fecal concentrations of other amino acids in mice with and without CR.** Fecal samples from SPF mice (n=12), SAB mice (n=12), mma mice (n=12), and hma mice (n=12) were collected. Amino acids (**A**) arginine, (**B**) leucine, (**C**) isoleucine, (**D**) lysine, (**E**) histidine, (**F**) phenylalanine, (**G**) tryptophan, (**H**) tyrosine, (**I**) valine, (**J**) glycine, (**K**) methionine and (**L**) alanine were analyzed by LC-MS/MS, before *C. jejuni* infection. Metabolite concentration was expressed by  $\mu\text{M}$ . Box plots indicate the 25<sup>th</sup> and 75<sup>th</sup> percentiles of the median (black bar inside the box), as well as the total range. Significance levels (p values) were determined by the Kruskal-Wallis test with Dunn's post correction for non-normally distributed data or one-sided ANOVA with Tukey correction for normally distributed data. Numbers (in parentheses) indicate the number of mice included.

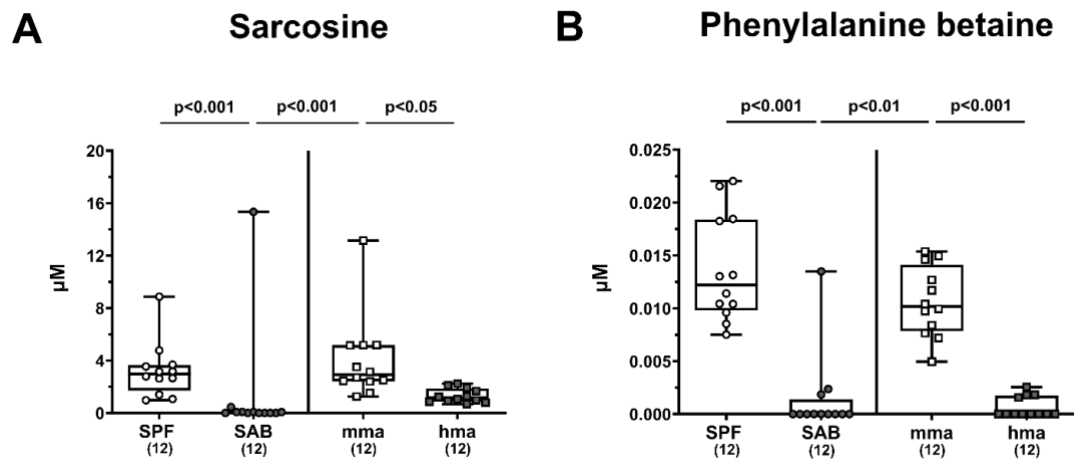

**Supplementary Figure 3. Fecal concentrations of amino acid-related metabolites in mice with and without CR.** Fecal samples from SPF mice (n=12), SAB mice (n=12), mma mice (n=12), and hma mice (n=12) were collected. The metabolites (A) sarcosine and (B) phenylalanine betaine were analyzed by LC-MS/MS, before *C. jejuni* infection. Metabolite concentration was expressed by  $\mu\text{M}$ . Box plots indicate the 25<sup>th</sup> and 75<sup>th</sup> percentiles of the median (black bar inside the box), as well as the total range. Significance levels (p values) were determined by the Kruskal-Wallis test with Dunn's post correction. Numbers (in parentheses) indicate the number of mice included.

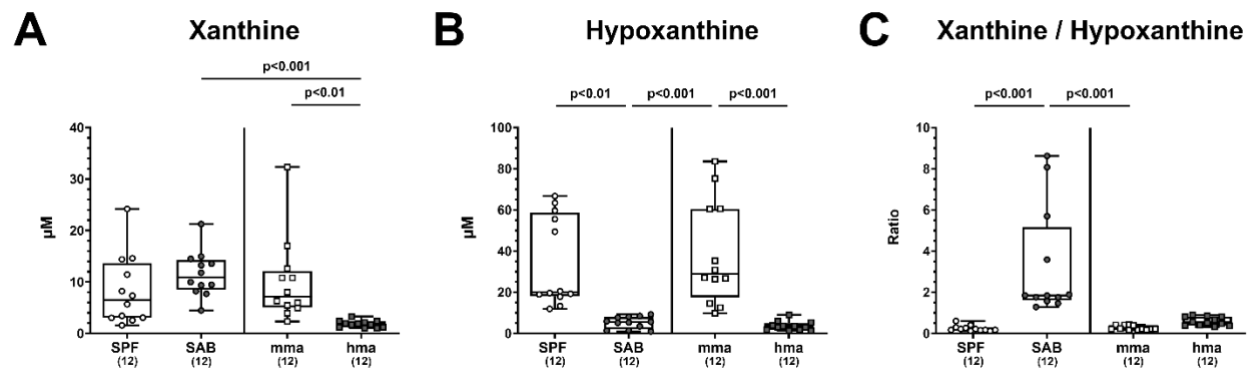

**Supplementary Figure 4. Fecal concentrations of purine metabolites in mice with and without CR.** Fecal samples from SPF mice (n=12), SAB mice (n=12), mma mice (n=12), and hma mice (n=12) were collected. The metabolites (A) xanthine and (B) hypoxanthine were analyzed by LC-MS/MS, before *C. jejuni* infection. (C) the ratio of xanthine/hypoxanthine, an indicator of xanthine synthesis was computed. Metabolite concentration was expressed by  $\mu\text{M}$ . Box plots indicate the 25<sup>th</sup> and 75<sup>th</sup> percentiles of the median (black bar inside the box), as well as the total range. Significance levels (p values) were determined by the Kruskal-Wallis test with Dunn's post correction. Numbers (in parentheses) indicate the number of mice included.
